# Supplementary material for: Exploratory Efficacy of Calcium-Vitamin D Milk Fortification and Periodontal Therapy on Maternal Oral Health and Metabolic and Inflammatory Profile
Source: PubMed Central journal article supplement (PMC7997467; doi:10.3390/nu13030783), 2021-02-27
Supplement: nutrients-13-00783-s001.pdf [file nutrients-13-00783-s001.pdf]

## Supplementary Material

**Table S1.** Main outcomes per intention to treat (ITT) analysis according to intervention groups in pregnant and postpartum women participating in the IMPROVE trial.

|                          | Early PT      |              |         |              | Late PT       |              |         |              | <i>p</i> -<br><i>value</i> |
|--------------------------|---------------|--------------|---------|--------------|---------------|--------------|---------|--------------|----------------------------|
|                          | Fortification |              | Placebo |              | Fortification |              | Placebo |              |                            |
|                          | n             | Mean (SD)    | n       | Mean (SD)    | n             | Mean (SD)    | n       | Mean (SD)    |                            |
| <b>BOP (%)</b>           |               |              |         |              |               |              |         |              |                            |
| T0                       | 17            | 0.21 (0.15)  | 15      | 0.20 (0.14)  | 19            | 0.15 (0.11)  | 18      | 0.23 (0.16)  | <b>&lt;0.01</b><br>(0.76)  |
| T2                       |               | 0.13 (0.12)  |         | 0.09 (0.07)  |               | 0.20 (0.20)  |         | 0.29 (0.18)  |                            |
| $\Delta$ T               |               | -0.10 (0.15) |         | -0.11 (0.15) |               | 0.04 (0.19)  |         | 0.07 (0.15)  |                            |
| <b>PD (mm)</b>           |               |              |         |              |               |              |         |              |                            |
| T0                       | 17            | 4.30 (0.20)  | 15      | 4.24 (0.23)  | 19            | 4.27 (0.19)  | 18      | 4.30 (0.27)  | 0.76 (0.36)                |
| T2                       |               | 4.27 (0.19)  |         | 4.22 (0.26)  |               | 4.20 (0.13)  |         | 4.29 (0.17)  |                            |
| $\Delta$ T               |               | -0.03 (0.24) |         | -0.02 (0.19) |               | -0.07 (0.21) |         | -0.01 (0.22) |                            |
| <b>CAL (mm)</b>          |               |              |         |              |               |              |         |              |                            |
| T0                       | 17            | 4.3 (0.19)   | 15      | 4.21 (0.21)  | 19            | 4.22 (0.19)  | 18      | 4.28 (0.24)  | 0.22 (0.32)                |
| T2                       |               | 4.30 (0.20)  |         | 4.29 (0.34)  |               | 4.37 (0.43)  |         | 4.29 (0.17)  |                            |
| $\Delta$ T               |               | 0.00 (0.25)  |         | 0.07 (0.3)   |               | 0.13 (0.48)  |         | 0.01 (0.27)  |                            |
| <b>Calcium (mg/dL)</b>   |               |              |         |              |               |              |         |              |                            |
| T0                       | 17            | 9.1 (0.6)    | 14      | 9.2 (0.5)    | 19            | 9.3 (0.7)    | 18      | 9.0 (0.6)    | 0.25 (0.44)                |
| T1                       |               | 8.8 (0.5)    |         | 8.7 (0.5)    |               | 8.9 (0.5)    |         | 9.0 (0.8)    |                            |
| T2                       |               | 9.1 (0.7)    |         | 8.7 (0.6)    |               | 9.2 (0.6)    |         | 9.0 (0.7)    |                            |
| $\Delta$ T               |               | 0 (0.9)      |         | -0.5 (0.6)   |               | -0.1 (0.6)   |         | 0 (0.6)      |                            |
| <b>Vitamin D (ng/ml)</b> |               |              |         |              |               |              |         |              |                            |
| T0                       | 17            | 26.6 (9.8)   | 15      | 28.1 (14.3)  | 19            | 30.6 (6.0)   | 18      | 31.5 (11.9)  |                            |
| T1                       |               | 29.4 (9.2)   |         | 25.8 (8.0)   |               | 31.6 (8.8)   |         | 33.1 (9.6)   |                            |

|                                       |    |                    |    |                    |    |                  |    |                    |                    |
|---------------------------------------|----|--------------------|----|--------------------|----|------------------|----|--------------------|--------------------|
| T2                                    |    | 23.4 (10.5)        |    | 28.8<br>(11.5)     |    | 27.2<br>(7.1)    |    | 28.1<br>(9.5)      |                    |
| $\Delta T$                            |    | -0.9 (8.5)         |    | -2.7<br>(12.5)     |    | -2.7<br>(6.8)    |    | -2.4<br>(6.7)      | 0.68 (0.79)        |
| <b>CRP (mg/L)</b>                     |    |                    |    |                    |    |                  |    |                    |                    |
| T0                                    |    | 11.1 (7.3)         |    | 9.8<br>(6.3)       |    | 11.9<br>(9.5)    |    | 8.7<br>(5.0)       |                    |
| T1                                    | 17 | 7.8 (4.8)          | 15 | 5.3<br>(3.8)       | 19 | 12.5<br>(8.0)    | 18 | 10.1<br>(8.4)      |                    |
| T2                                    |    | 6.4 (4.9)          |    | 7.6<br>(7.5)       |    | 7.2 (7.4)        |    | 4.6<br>(3.5)       |                    |
| $\Delta T$                            |    | -4.9 (6.4)         |    | -2.1<br>(8.9)      |    | -5.3<br>(9.4)    |    | -4.1<br>(4.5)      | 0.57 (0.31)        |
| <b>Glucose (mg/dL)</b>                |    |                    |    |                    |    |                  |    |                    |                    |
| T0                                    |    | 72.8 (8.6)         |    | 74.0<br>(8.2)      |    | 73.5<br>(7.0)    |    | 73.6<br>(8.6)      |                    |
| T1                                    | 17 | 76.5 (12.4)        | 15 | 68.8<br>(9.0)      | 19 | 74.0<br>(12.9)   | 18 | 77.2<br>(14.3)     |                    |
| T2                                    |    | 80.2 (14.6)        |    | 75.9<br>(6.8)      |    | 78.5<br>(11.5)   |    | 81.3<br>(11.8)     |                    |
| $\Delta T$                            |    | 4.9 (16.3)         |    | 3.0<br>(8.9)       |    | 4.7<br>(12.5)    |    | 5.9<br>(13.5)      | 0.71 (0.98)        |
| <b>Insulin (<math>\mu</math>U/ml)</b> |    |                    |    |                    |    |                  |    |                    |                    |
| T0                                    |    | 7.9 (3.7)          |    | 9.8<br>(7.2)       |    | 8.7 (3.8)        |    | 7.9<br>(3.7)       |                    |
| T1                                    | 17 | 8.4 (3.6)          | 15 | 8.8<br>(3.3)       | 19 | 11.4<br>(4.3)    | 18 | 10.0<br>(3.8)      |                    |
| T2                                    |    | 7.6 (5.2)          |    | 5.7<br>(2.8)       |    | 5.0 (2.5)        |    | 4.5<br>(1.9)       |                    |
| $\Delta T$                            |    | -0.6 (6.4)         |    | -1.4<br>(4.4)      |    | -3.7<br>(3.0)    |    | -3.0<br>(3.1)      | <b>0.03</b> (0.09) |
| <b>Birthweight (g)</b>                |    |                    |    |                    |    |                  |    |                    |                    |
| T2                                    | 13 | 3,467.1<br>(327.0) | 9  | 3,266.8<br>(457.6) | 17 | 3,334.8<br>(385) | 16 | 3,404.8<br>(573.6) | 0.85(0.73)         |

*Bold: p-value less than 0.05 for periodontal treatment (outside parenthesis) or milk fortification (inside parenthesis).*

*BOP: Sites with bleeding on probing; CAL: clinical attachment loss; CRP: ultra-sensitive C-Reactive Protein; PD: pocket depth.*
